# Supplementary material
Source: ML conference proceedings conference paper supplement (https://openreview.net/forum?id=00OqOl4txhe)
Supplement: supplementary_material [file attachment]

# APPENDIX for: Learning Interpretable BEV Based VIO without Deep Neural Networks

Anonymous Author(s)

## 1 I Pseudocode for DUKF in BEVO

2 In this Section, We elaborate upon the description of DUKF utilized in BEVO with the pseudocode  
3 shown in Algorithm 1, as well as the training process of BEVO in 2. Note:  $x_t$  stands for state  $x$  in  
4 time  $t$ .

## 5 II Pseudocode for BEVO+

6 We further elaborate upon the extension of BEVO as the differentiable front-end of differentiable  
7 localization. The localization and the odometry are trained together end to end with the robot's  
8 location as the supervision, and is available for localization in heterogeneous maps. Similar to how  
9 we retrieve pitch and roll in BEVO, we also utilize the DUKF for localization, and name the whole  
10 process as BEVO+. The pseudocode for the localization is shown in Algorithm 3 and Algorithm 4.  
11 Note: In these algorithms,  $\{x_t, y_t, yaw_t\}$  stands for the 2D location and the heading angle of the  
12 robot in time  $t$ .

## 13 III Experimental Setups for Heterogeneous Localization

14 We take the GPS data as the ground truth to evaluate the performance of the localization. For each  
15 scene, we train the odometry and the localization with the first two quarters of the data, evaluate it  
16 with the third quarter, and test it with the last quarter.

- 17 • In CARLA, we localize a vehicle on the satellite map in different weathers. We train and utilize  
18 BEVO as the odometry and localize the projected BEV (from different weathers) on the heteroge-  
19 neous satellite map.
- 20 • The AeroGround (AG) Dataset is collected for multi-robot collaboration. In this dataset, we train  
21 and utilize BEVO as the odometry and localize the ground robot with its front camera BEV on the  
22 heterogeneous map built by a drone.

## 23 IV Visual Results on Odometry

24 In this Section, we elaborate upon the visual demonstration of the odometry for sequence 00~08  
25 of the KITTI dataset. These sequences are the training and validation sets. The demonstrations are  
26 shown in Fig. 1. Together with the demonstration of sequence 09~10, the results show that BEVO  
27 stays robust not only in training, validation, but also in the testing. We argue that this is achieved  
28 knowing the testing sequences share the same sensor as the training. This proves that the training of  
29 BEVO for each sensor can be applied once for all.

## 30 V Visual Results on Localization

31 In this Section, we show more visual results of the differentiable localization, BEVO+. Since the  
32 performance of BEVO+ in the real world is demonstrated in the original paper, we gave a set of  
33 demonstration in different settings of Carla, to study the robustness of the method, as shown in  
34 Fig. 2. We first train the localization in sunny days of Town 1, with randomly generated obstacles,

---

**Algorithm 1** Unscented Kalman Filter (UKF)

---

**Input:**  $x_{t-1}, \Delta x_{t-1}, x\_measure_t$ **Output:**  $x_t$ 

- 1: **Load**  $\mu_{t-1}, \sigma_{t-1}$  **into this recursion.**
  - 2:  $X_{t-1} \leftarrow \text{Sampling}([x_{t-1}], \sigma_{t-1})$
  - 3:  $\bar{X}_t^* \leftarrow \text{MotionModel}(X_{t-1}, [\Delta x_{t-1}])$
  - 4:  $\bar{\mu}_t \leftarrow \text{WeightedAverage}(\bar{X}_t^*)$
  - 5:  $\bar{\sigma}_t \leftarrow \text{WeightedAverage}[(\bar{X}_t^* - \bar{\mu}_t)(\bar{X}_t^* - \bar{\mu}_t)^T] + \text{Motion Noise } O_t$
  - 6:  $\bar{X}_t \leftarrow \text{Sampling}(\bar{\mu}_t, \bar{\sigma}_t)$
  - 7:  $\bar{Z}_t \leftarrow \text{MeasurementModel}(\bar{X}_t)$
  - 8:  $\bar{M}_t \leftarrow \text{WeightedAverage}(\bar{Z}_t)$
  - 9:  $\sum_t \leftarrow \text{WeightedAverage}[(\bar{Z}_t - \bar{M}_t)(\bar{Z}_t - \bar{M}_t)^T] + \text{Measurement Noise } Q_t$
  - 10:  $\sum_t^{X,Z} \leftarrow \text{WeightedAverage}[(\bar{X}_t^i - \bar{\mu}_t)(\bar{Z}_t^i - \bar{M}_t)^T]$
  - 11:  $K_t \leftarrow \sum_t^{X,Z} \sum_t^{-1}$
  - 12:  $Z_t \leftarrow [x\_measure_t]$
  - 13:  $\mu_t \leftarrow \bar{\mu}_t + K_t(Z_t - \bar{M}_t)$
  - 14:  $\sigma_t \leftarrow \bar{\sigma}_t + K_t \sum_t K_t^{-1}$
  - 15:  $x_t \leftarrow \mu_t$
  - 16: **return**  $x_t$
- 

---

**Algorithm 2** BEVO

---

**Input:**  $image_{t-1}, image_t, imu\_data$ , Ground Truth:  $\mathbf{t}_t^*, \theta_t^*$ **Output:** 2D translation:  $\mathbf{t}_t$ , pitch:  $\alpha_t$ , roll:  $\beta_t$ , yaw:  $\theta_t$ 

- 1: **Load**  $\alpha_{t-1}, \beta_{t-1}$  **from last recursion of BEVO into this recursion.**
  - 2: **Load**  $\omega_{\alpha_{t-1}}, \omega_{\beta_{t-1}}$  **from**  $imu\_data$
  - 3: **Load**  $acc_t^x, acc_t^y, acc_t^z$  **from**  $imu\_data$
  - 4: **Load**  $\Delta t$  **from**  $imu\_data$
  - 5:  $[\Delta\alpha_{t-1}, \Delta\beta_{t-1}] \leftarrow [\omega_{\alpha_{t-1}}, \omega_{\beta_{t-1}}] \times \Delta t$
  - 6:  $\alpha\_measure_t \leftarrow -\arctan(acc_t^x / \sqrt{acc_t^y{}^2 + acc_t^z{}^2})$
  - 7:  $\beta\_measure_t \leftarrow \arctan(acc_t^y / acc_t^z)$
  - 8:  $[\alpha_t, \beta_t] \leftarrow \text{UKF}([\alpha_{t-1}, \beta_{t-1}], [\Delta\alpha_{t-1}, \Delta\beta_{t-1}], [\alpha\_measure_t, \beta\_measure_t])$
  - 9:  $image_{t-1}^{bev} \leftarrow \text{BEVProjection}(image_{t-1}, \alpha_{t-1}, \beta_{t-1})$
  - 10:  $image_t^{bev} \leftarrow \text{BEVProjection}(image_t, \alpha_t, \beta_t)$
  - 11:  $[\mathbf{t}_t, \theta_t] \leftarrow \text{DPC}(image_{t-1}^{bev}, image_t^{bev})$
  - 12: **Loss**  $\mathcal{L}([\mathbf{t}_t^*, \theta_t^*], [\mathbf{t}_t, \theta_t])$
  - 13: **Backward**
  - 14: **return**  $\mathbf{t}_t, \theta_t, \alpha_t, \beta_t$
- 

35 and test it in Town 2, denoted as “Dynamic Obstacles”. Then we remove the dynamic obstacles, also  
36 train in Town 1 and test in Town 2, named as “Sunny”. Finally, we change the lighting condition to  
37 nighttime, and train the localization in Town 1 and test in Town 2, denoted as “Night”. The results  
38 shows that BEVO+ is robust if the modality of sensors and the global map in the testing stage stay  
39 unchanged with that of training stage. Note: The green points which stand for BEVO+ in the figure  
40 is almost invisible because they are mostly overlapped with the ground truth.

## 41 VI Related Works

42 In this section, we will introduce the related works of VIO, mainly divided into two parts, traditional  
43 methods and learning-based methods.

### 44 VI.1 Traditional Methods

45 Visual-inertial odometry aims to fuse data from the camera and inertial measurement unit to estimate  
46 the ego-motion. Traditional VIO methods are mainly based on filtering and optimization. Mourikis

---

**Algorithm 3** BEVO For Localization (BEVO+)

---

**Input:**  $image_{t-1}, image_t, imu\_data, drone\_map, x_{t-1}, y_{t-1}, yaw_{t-1}$   
**Output:**  $x_t, y_t, yaw_t$

- 1:  $[\Delta x_{t-1}, \Delta y_{t-1}, \Delta yaw_{t-1}] \leftarrow \text{BEVO}(image_{t-1}, image_t, imu\_data)$
- 2:  $[x_t^*, y_t^*, yaw_t^*] \leftarrow [x_{t-1} + \Delta x_{t-1}, y_{t-1} + \Delta y_{t-1}, yaw_{t-1} + \Delta yaw_{t-1}]$
- 3: Load bev image of  $image_t$  from BEVO as  $image_t^b$ .
- 4:  $image_t^* \leftarrow \text{CropInDroneMap}(x_t^*, y_t^*, yaw_t^*)$
- 5:  $[\Delta x_t', \Delta y_t', \Delta yaw_t'] \leftarrow \text{DPC}(image_t^b, image_t^*)$
- 6:  $[x_{t.measurement}, y_{t.measurement}, yaw_{t.measurement}] \leftarrow [x_t^* + \Delta x_t', y_t^* + \Delta y_t', yaw_t^* + \Delta yaw_t']$
- 7:  $[x_t, y_t, yaw_t] \leftarrow \text{UKF\_ForLocalization}([x_{t-1}, y_{t-1}, yaw_{t-1}],$   
 $[\Delta x_{t-1}, \Delta y_{t-1}, \Delta yaw_{t-1}],$   
 $[x_{t.measurement}, y_{t.measurement}, yaw_{t.measurement}])$
- 8: **return**  $x_t, y_t, yaw_t$

---

---

**Algorithm 4** UKF\_ForLocalization

---

**Input:**  $[x_{t-1}, y_{t-1}, yaw_{t-1}], [\Delta x_{t-1.odom}, \Delta y_{t-1.odom}, \Delta yaw_{t-1.odom}],$   
 $[x_{t.measurement}, y_{t.measurement}, yaw_{t.measurement}]$   
**Output:**  $[x_t, y_t, yaw_t]$

- 1: **Load**  $\mu_{t-1}, \sigma_{t-1}$  **into this recursion.**
- 2:  $X_{t-1} \leftarrow \text{Sampling}([x_{t-1}, y_{t-1}, yaw_{t-1}], \sigma_{t-1})$
- 3:  $\bar{X}_t^* \leftarrow \text{MotionModel}(X_{t-1}, [\Delta x_{t-1.odom}, \Delta y_{t-1.odom}, \Delta yaw_{t-1.odom}])$
- 4:  $\bar{\mu}_t \leftarrow \text{WeightedAverage}(\bar{X}_t^*)$
- 5:  $\bar{\sigma}_t \leftarrow \text{WeightedAverage}[(\bar{X}_t^* - \bar{\mu}_t)(\bar{X}_t^* - \bar{\mu}_t)^T] + \text{Motion Noise } O_t$
- 6:  $\bar{X}_t \leftarrow \text{Sampling}(\bar{\mu}_t, \bar{\sigma}_t)$
- 7:  $\bar{Z}_t \leftarrow \text{MeasurementModel}(\bar{X}_t)$
- 8:  $\bar{M}_t \leftarrow \text{WeightedAverage}(\bar{Z}_t)$
- 9:  $\bar{\Sigma}_t \leftarrow \text{WeightedAverage}[(\bar{Z}_t - \bar{M}_t)(\bar{Z}_t - \bar{M}_t)^T] + \text{Measurement Noise } Q_t$
- 10:  $\bar{\Sigma}_t^{X,Z} \leftarrow \text{WeightedAverage}[(\bar{X}_t^i - \bar{\mu}_t)(\bar{Z}_t^i - \bar{M}_t)^T]$
- 11:  $K_t \leftarrow \bar{\Sigma}_t^{X,Z} \bar{\Sigma}_t^{-1}$
- 12:  $Z_t \leftarrow [x_{t.measurement}, y_{t.measurement}, yaw_{t.measurement}]$
- 13:  $\mu_t \leftarrow \bar{\mu}_t + K_t(Z_t - \bar{M}_t)$
- 14:  $\sigma_t \leftarrow \bar{\sigma}_t + K_t \bar{\Sigma}_t K_t^{-1}$
- 15:  $[x_t, y_t, yaw_t] \leftarrow \mu_t$
- 16: **return**  $x_t, y_t, yaw_t$

---

47 et al. [1] propose a Multi-State Constraint Kalman Filter (MSCKF) method that utilizes the EKF  
48 to estimate poses. Moreover, Li et al. [2] improve the MSCKF approach by ensuring the correct  
49 observability properties and performing online estimation of calibration parameters. Sun et al. [3]  
50 present a stereo version MSCKF which is robust and efficient. OKVIS [4] optimizes through key-  
51 frame while VINS-Mono [5] is a state estimator based on nonlinear optimization, which contains a  
52 tightly coupled visual-inertial odometry and performs global pose graph optimization. These robust  
53 methods can generalize well but require empirical parameter tuning which is labor intensive.

## 54 VI.2 Learning-based Methods

55 VINet [6] is the first end-to-end learning-based method for visual-inertial odometry which elimi-  
56 nates the need for manual synchronization and calibration. DeepVO [7] uses Recurrent Convolu-  
57 tional Neural Networks to learn feature representation in visual odometry problems. Wang et al. [8]  
58 present TartanVO, which can generalize to multiple datasets and real-world scenarios. DeepVIO  
59 [9] merges 2D optical flow features and IMU data to provide absolute trajectory estimation, dur-  
60 ing which the depth and dense point cloud are estimated. More recent works, e.g., SelfVIO [10],  
61 CodeVIO [11], UnDeepVO [12], Li et al. [13], also take advantage of depth estimation to achieve  
62 high pose estimation accuracy. However, all methods above train a large network with millions of  
63 parameters, resulting in heavy models and are merely interpretable with weak generalization abil-

64 ity. Therefore, we set to solve this problem by introducing a fully interpretable model with only 4  
65 trainable parameters.

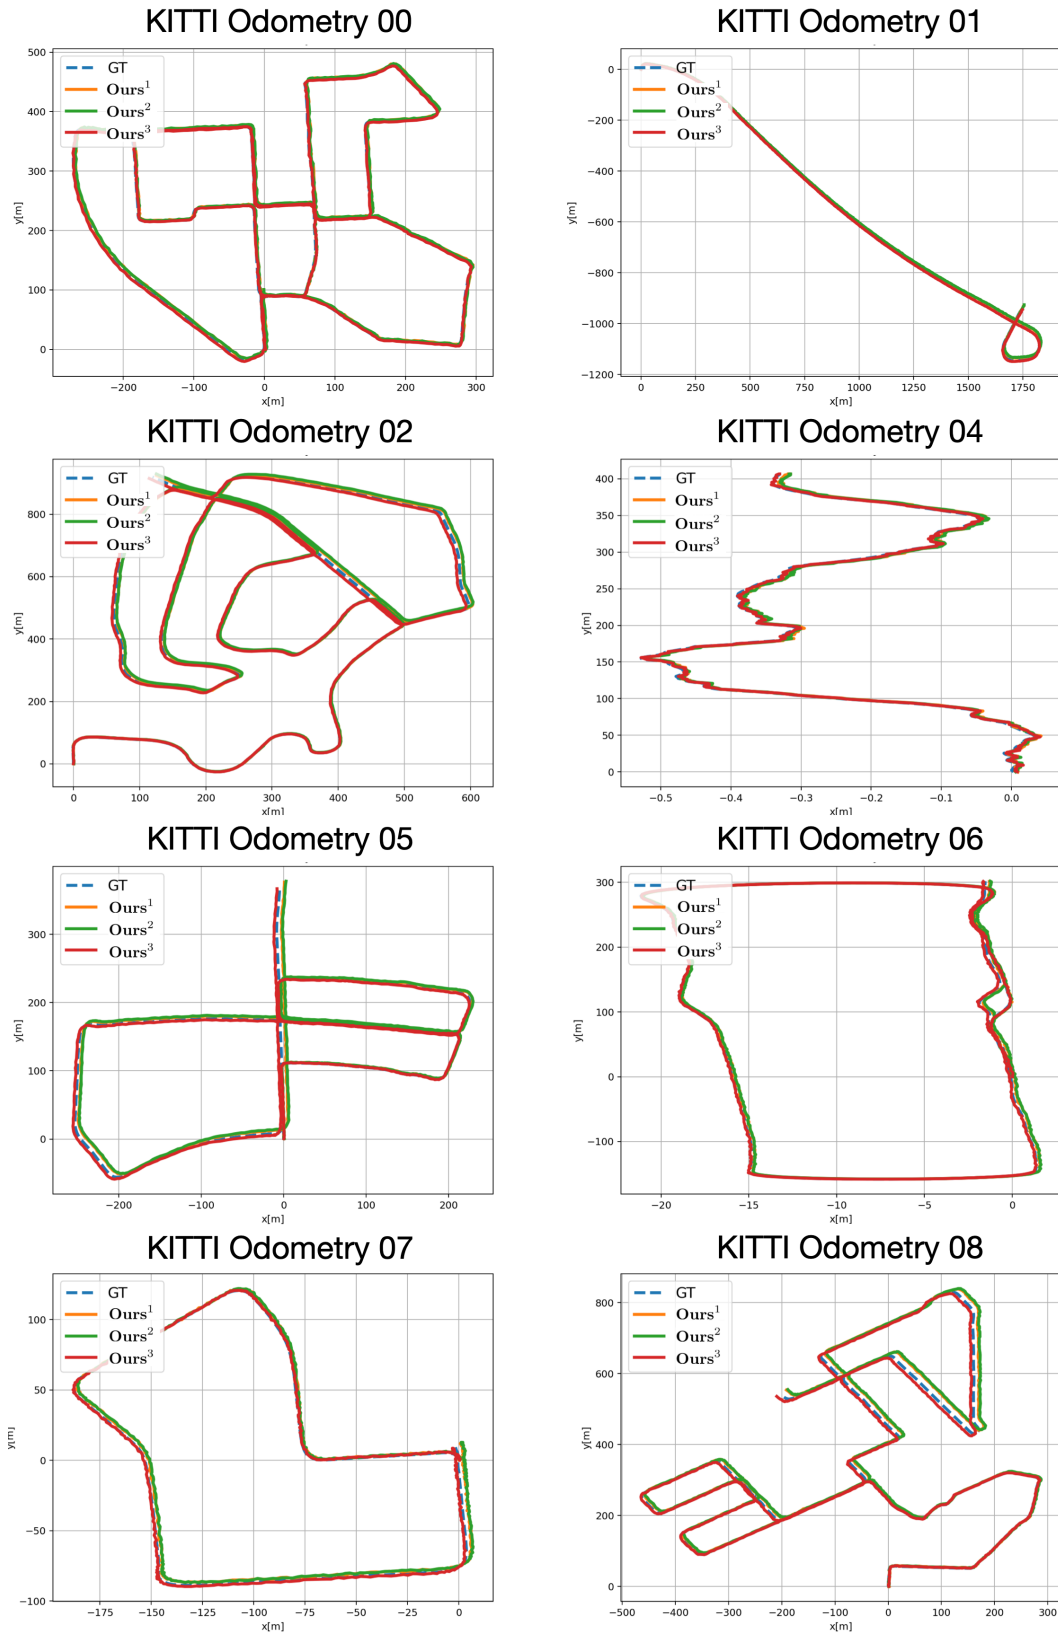

Figure 1: The visual demonstration of BEVO in sequence 00~08 of KITTI.

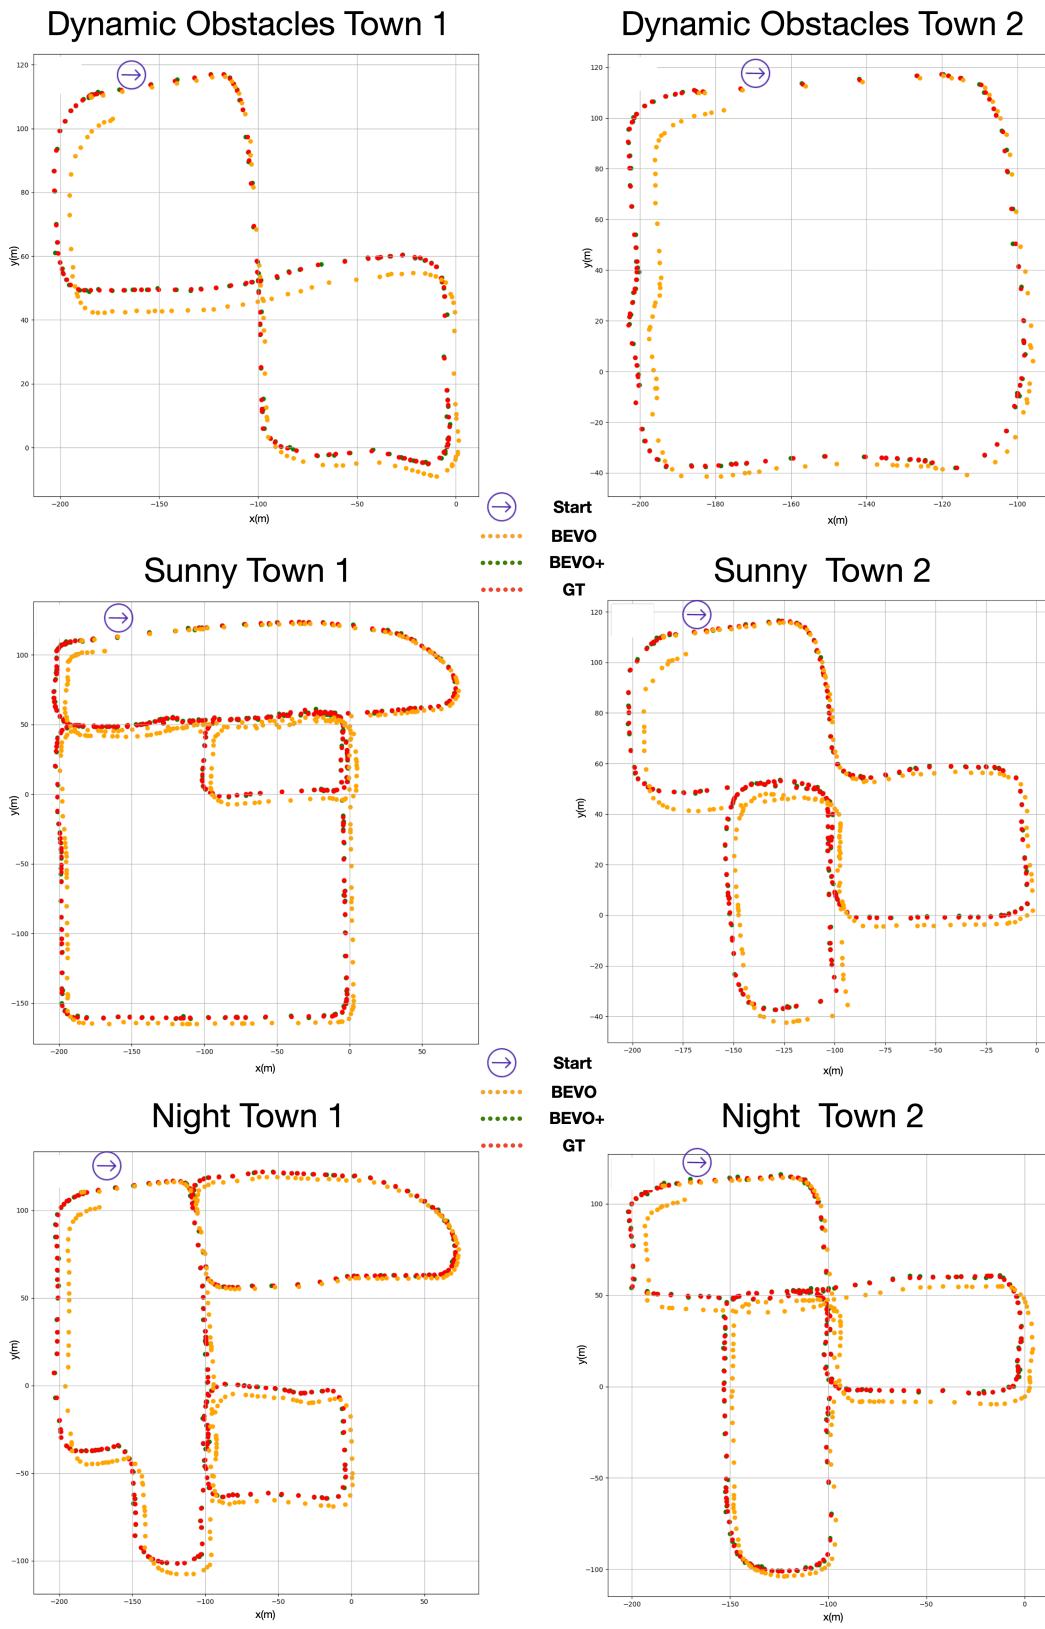

Figure 2: The **qualitative demonstration** of the localization in different conditions of Carla.

## References

- [1] A. I. Mourikis and S. I. Roumeliotis. A multi-state constraint kalman filter for vision-aided inertial navigation. In *Proceedings 2007 IEEE International Conference on Robotics and Automation*, pages 3565–3572. IEEE, 2007.
- [2] M. Li and A. I. Mourikis. High-precision, consistent ekf-based visual-inertial odometry. *The International Journal of Robotics Research*, 32(6):690–711, 2013.
- [3] K. Sun, K. Mohta, B. Pfrommer, M. Watterson, S. Liu, Y. Mulgaonkar, C. J. Taylor, and V. Kumar. Robust stereo visual inertial odometry for fast autonomous flight. *IEEE Robotics and Automation Letters*, 3(2):965–972, 2018.
- [4] S. Leutenegger, S. Lynen, M. Bosse, R. Siegwart, and P. Furgale. Keyframe-based visual-inertial odometry using nonlinear optimization. *The International Journal of Robotics Research*, 34(3):314–334, 2015.
- [5] T. Qin, P. Li, and S. Shen. Vins-mono: A robust and versatile monocular visual-inertial state estimator. *IEEE Transactions on Robotics*, 34(4):1004–1020, 2018.
- [6] R. Clark, S. Wang, H. Wen, A. Markham, and N. Trigoni. Vinet: Visual-inertial odometry as a sequence-to-sequence learning problem. In *Proceedings of the AAAI Conference on Artificial Intelligence*, volume 31, 2017.
- [7] S. Wang, R. Clark, H. Wen, and N. Trigoni. Deepvo: Towards end-to-end visual odometry with deep recurrent convolutional neural networks. In *2017 IEEE International Conference on Robotics and Automation (ICRA)*, pages 2043–2050. IEEE, 2017.
- [8] W. Wang, Y. Hu, and S. Scherer. Tartanvo: A generalizable learning-based vo. *arXiv preprint arXiv:2011.00359*, 2020.
- [9] L. Han, Y. Lin, G. Du, and S. Lian. Deepvio: Self-supervised deep learning of monocular visual inertial odometry using 3d geometric constraints. In *2019 IEEE/RSJ International Conference on Intelligent Robots and Systems (IROS)*, pages 6906–6913. IEEE, 2019.
- [10] Y. Almalioglu, M. Turan, A. E. Sari, M. R. U. Saputra, P. P. de Gusmão, A. Markham, and N. Trigoni. Selfvio: Self-supervised deep monocular visual-inertial odometry and depth estimation. *arXiv preprint arXiv:1911.09968*, 2019.
- [11] X. Zuo, N. Merrill, W. Li, Y. Liu, M. Pollefeys, and G. Huang. Codevio: Visual-inertial odometry with learned optimizable dense depth. *arXiv preprint arXiv:2012.10133*, 2020.
- [12] R. Li, S. Wang, Z. Long, and D. Gu. Undeepvo: Monocular visual odometry through unsupervised deep learning. In *2018 IEEE international conference on robotics and automation (ICRA)*, pages 7286–7291. IEEE, 2018.
- [13] S. Li, X. Wang, Y. Cao, F. Xue, Z. Yan, and H. Zha. Self-supervised deep visual odometry with online adaptation. In *Proceedings of the IEEE/CVF Conference on Computer Vision and Pattern Recognition*, pages 6339–6348, 2020.
